# Supplementary material
Source: PubMed Central journal article supplement (PMC4042526)

**Tbx20**

**Eh1mut**

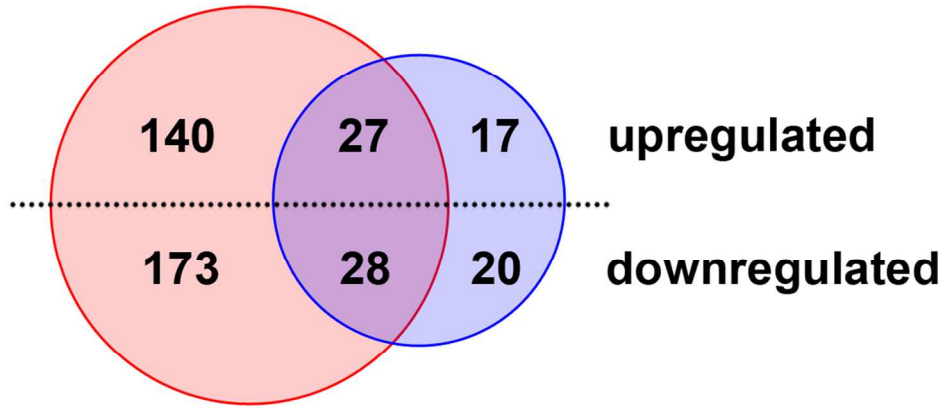

101x56mm (300 x 300 DPI)

Supplement: NIHMS529401-supplement-2_si_001.pdf [file NIHMS529401-supplement-2_si_001.pdf]
